# Supplementary material for: Genetic Diversity in Leatherback Turtles (Dermochelys coriacea) along the Andaman Sea of Thailand
Source: MDPI journal article supplement (doi:10.3390/d14090764), 2022-09-15
Supplement: s1 [file s1]

**Table S3.** The pairwise population Fst values of genetic distance.

|               | <b>Zone 1</b> | <b>Zone 2</b> | <b>Zone 3</b> | <b>Zone 4</b> | <b>Zone 5</b> |
|---------------|---------------|---------------|---------------|---------------|---------------|
| <b>Zone 1</b> | -             |               |               |               |               |
| <b>Zone 2</b> | 0.165         | -             |               |               |               |
| <b>Zone 3</b> | 0.190         | 0.048         | -             |               |               |
| <b>Zone 4</b> | 0.167         | 0.074         | 0.066         | -             |               |
| <b>Zone 5</b> | 0.092         | 0.287         | 0.302         | 0.295         | -             |
