# Supplementary material for: Genetic Diversity in Leatherback Turtles (Dermochelys coriacea) along the Andaman Sea of Thailand
Source: MDPI journal article supplement (doi:10.3390/d14090764), 2022-09-15
Supplement: s1 [file s1]

**Table S2.** Leatherback turtles mitochondrial DNA control region sequences retrieved from GenBank.

| Location                                      | Abbreviation | Environment                                                                      | Sample size | References               |
|-----------------------------------------------|--------------|----------------------------------------------------------------------------------|-------------|--------------------------|
| Thailand                                      | THA          | Nesting area                                                                     | 144         | This study               |
|                                               |              |                                                                                  | 23          | Dutton et al. (2013)     |
| Brazil                                        | nBRA         | Nesting area                                                                     | 11          | Vargas et al. (2008)     |
|                                               |              |                                                                                  | 2           | Vargas et al. (2019)     |
| Costa Rica                                    | ACR          | Nesting area                                                                     | 132         | Dutton et al. (2013)     |
| Florida                                       | FLA          | Nesting area                                                                     | 222         | Dutton et al. (2013)     |
| St. Croix                                     | STX          | Nesting area                                                                     | 123         | Dutton et al. (2013)     |
| Trinidad                                      | TRI          | Nesting area                                                                     | 87          | Dutton et al. (2013)     |
| French Guiana/Suriname                        | GUI          | Nesting area                                                                     | 138         | Dutton et al. (2013)     |
|                                               |              |                                                                                  | 39          | Molfetti et al. (2013)   |
| Guadaloupe and Martinica (French West Indies) | FWI          | Nesting area                                                                     | 29          | Molfetti et al. (2013)   |
| Dominican Republic                            | DR           | Nesting area                                                                     | 42          | Carreras et al. (2013)   |
| Ghana                                         | GHA          | Nesting area                                                                     | 60          | Dutton et al. (2013)     |
| Gabon                                         | GAB          | Nesting area                                                                     | 233         | Dutton et al. (2013)     |
| South Africa                                  | SAF          | Nesting area                                                                     | 41          | Dutton et al. (2013)     |
| Espirito Santo State (Brazil)                 | ES           | Incidental capture or stranded samples collected on the beaches                  | 8           | Vargas et al. (2019)     |
| Southern Brazil (Brazil)                      | SB           | foraging ground, Incidental capture or Stranded samples collected on the beaches | 52          | Vargas et al. (2008)     |
|                                               |              |                                                                                  | 42          | Vargas et al. (2019)     |
| Buenos Aires                                  | BA           | Foraging ground                                                                  | 33          | Prosdocimi et al. (2014) |
| Japan                                         | JP           | Stranded samples collected on the beaches                                        | 16          | Yoshikawa et al. (2016)  |
| Pacific                                       | PCF          | -                                                                                | 3           |                          |
| Indonesia                                     | IND          | -                                                                                | 1           |                          |
| Not locate                                    | NL           | -                                                                                | 3           |                          |
| total                                         |              |                                                                                  | 1,484       |                          |
