# Supplementary material for: Genetic Diversity in Leatherback Turtles (Dermochelys coriacea) along the Andaman Sea of Thailand
Source: MDPI journal article supplement (doi:10.3390/d14090764), 2022-09-15
Supplement: s1 [file s1]

**Table S1.** Metadata and sampling codes for Andaman Sea Thailand leatherback turtle populations.

| No. | Code  | Next No. | Beach     | Province  | LAT     | LON     | Spawning date | Hatching date | Accession No. |
|-----|-------|----------|-----------|-----------|---------|---------|---------------|---------------|---------------|
| 1   | 1.1   | 1        | Khuk Khak | Phang-nga | 8.68359 | 98.2406 | 17/12/2018    | 11/2/2019     | OK040291      |
| 2   | 1.2   | 1        | Khuk Khak | Phang-nga | 8.68359 | 98.2406 | 17/12/2018    | 11/2/2019     | OK040292      |
| 3   | 1.3   | 1        | Khuk Khak | Phang-nga | 8.68359 | 98.2406 | 17/12/2018    | 11/2/2019     | OK040256      |
| 4   | 3.1   | 2        | Khuk Khak | Phang-nga | 8.6875  | 98.2401 | 8/1/2019      | 2/3/2019      | OK040252      |
| 5   | 3.2   | 2        | Khuk Khak | Phang-nga | 8.6875  | 98.2401 | 8/1/2019      | 2/3/2019      | OK040378      |
| 6   | 3.3   | 2        | Khuk Khak | Phang-nga | 8.6875  | 98.2401 | 8/1/2019      | 2/3/2019      | OK040262      |
| 7   | 3.5   | 2        | Khuk Khak | Phang-nga | 8.6875  | 98.2401 | 8/1/2019      | 2/3/2019      | OK040293      |
| 8   | A     | 2        | Khuk Khak | Phang-nga | 8.6875  | 98.2401 | 8/1/2019      | 2/3/2019      | OK040294      |
| 9   | B     | 2        | Khuk Khak | Phang-nga | 8.6875  | 98.2401 | 8/1/2019      | 2/3/2019      | OK040379      |
| 10  | C     | 2        | Khuk Khak | Phang-nga | 8.6875  | 98.2401 | 8/1/2019      | 2/3/2019      | -             |
| 11  | A1.1  | 3        | Bor Dan   | Phang-nga | 8.32848 | 98.2636 | 27/11/2019    | 21/1/2020     | OK040295      |
| 12  | A1.2  | 3        | Bor Dan   | Phang-nga | 8.32848 | 98.2636 | 27/11/2019    | 21/1/2020     | OK040263      |
| 13  | A1.3  | 3        | Bor Dan   | Phang-nga | 8.32848 | 98.2636 | 27/11/2019    | 21/1/2020     | OK040296      |
| 14  | A1.4  | 3        | Bor Dan   | Phang-nga | 8.32848 | 98.2636 | 27/11/2019    | 21/1/2020     | OK040297      |
| 15  | A2.1  | 3        | Bor Dan   | Phang-nga | 8.32848 | 98.2636 | 27/11/2019    | 21/1/2020     | OK040298      |
| 16  | A2.2  | 3        | Bor Dan   | Phang-nga | 8.32848 | 98.2636 | 27/11/2019    | 21/1/2020     | OK040299      |
| 17  | A2.3  | 3        | Bor Dan   | Phang-nga | 8.32848 | 98.2636 | 27/11/2019    | 21/1/2020     | OK040300      |
| 18  | A2.4  | 3        | Bor Dan   | Phang-nga | 8.32848 | 98.2636 | 27/11/2019    | 21/1/2020     | OK040301      |
| 19  | A3.1  | 3        | Bor Dan   | Phang-nga | 8.32848 | 98.2636 | 27/11/2019    | 21/1/2020     | -             |
| 20  | A3.2  | 3        | Bor Dan   | Phang-nga | 8.32848 | 98.2636 | 27/11/2019    | 21/1/2020     | OK040264      |
| 21  | A3.3  | 3        | Bor Dan   | Phang-nga | 8.32848 | 98.2636 | 27/11/2019    | 21/1/2020     | OK040302      |
| 22  | A3.4  | 3        | Bor Dan   | Phang-nga | 8.32848 | 98.2636 | 27/11/2019    | 21/1/2020     | OK040265      |
| 23  | B2.1  | 3        | Bor Dan   | Phang-nga | 8.32848 | 98.2636 | 27/11/2019    | 21/1/2020     | OK040376      |
| 24  | B2.2  | 3        | Bor Dan   | Phang-nga | 8.32848 | 98.2636 | 27/11/2019    | 21/1/2020     | OK040386      |
| 25  | B2.3  | 3        | Bor Dan   | Phang-nga | 8.32848 | 98.2636 | 27/11/2019    | 21/1/2020     | OK040304      |
| 26  | B2.4  | 3        | Bor Dan   | Phang-nga | 8.32848 | 98.2636 | 27/11/2019    | 21/1/2020     | OK040381      |
| 27  | SKA1  | 4        | Sai Keaw  | Phuket    | 8.19015 | 98.287  | 20/1/2020     | 5/3/2020      | OK040375      |
| 28  | SKA2  | 4        | Sai Keaw  | Phuket    | 8.19015 | 98.287  | 20/1/2020     | 5/3/2020      | OK040382      |
| 29  | SKA3  | 4        | Sai Keaw  | Phuket    | 8.19015 | 98.287  | 20/1/2020     | 5/3/2020      | OK040258      |
| 30  | SKA4  | 4        | Sai Keaw  | Phuket    | 8.19015 | 98.287  | 20/1/2020     | 5/3/2020      | OK040267      |
| 31  | SKA5  | 4        | Sai Keaw  | Phuket    | 8.19015 | 98.287  | 20/1/2020     | 5/3/2020      | OK040268      |
| 32  | SKA7  | 4        | Sai Keaw  | Phuket    | 8.19015 | 98.287  | 20/1/2020     | 5/3/2020      | OK040269      |
| 33  | TSK01 | 4        | Sai Keaw  | Phuket    | 8.19015 | 98.287  | 20/1/2020     | 5/3/2020      | OK040278      |
| 34  | TSK02 | 4        | Sai Keaw  | Phuket    | 8.19015 | 98.287  | 20/1/2020     | 5/3/2020      | OK040279      |
| 35  | TSK03 | 4        | Sai Keaw  | Phuket    | 8.19015 | 98.287  | 20/1/2020     | 5/3/2020      | OK040280      |

|    |         |   |           |           |         |         |            |          |          |
|----|---------|---|-----------|-----------|---------|---------|------------|----------|----------|
| 36 | TSK04   | 4 | Sai Keaw  | Phuket    | 8.19015 | 98.287  | 20/1/2020  | 5/3/2020 | OK040281 |
| 37 | TSK05   | 4 | Sai Keaw  | Phuket    | 8.19015 | 98.287  | 20/1/2020  | 5/3/2020 | OK040282 |
| 38 | TSK06   | 4 | Sai Keaw  | Phuket    | 8.19015 | 98.287  | 20/1/2020  | 5/3/2020 | OK040259 |
| 39 | ESK07   | 4 | Sai Keaw  | Phuket    | 8.19015 | 98.287  | 20/1/2020  | 5/3/2020 | OK040361 |
| 40 | ESK08   | 4 | Sai Keaw  | Phuket    | 8.19015 | 98.287  | 20/1/2020  | 5/3/2020 | OK040362 |
| 41 | ESK10   | 4 | Sai Keaw  | Phuket    | 8.19015 | 98.287  | 20/1/2020  | 5/3/2020 | OK040363 |
| 42 | ESK12   | 4 | Sai Keaw  | Phuket    | 8.19015 | 98.287  | 20/1/2020  | 5/3/2020 | OK040364 |
| 43 | ESK21   | 4 | Sai Keaw  | Phuket    | 8.19015 | 98.287  | 20/1/2020  | 5/3/2020 | OK040365 |
| 44 | A6      | 5 | Nai Thon  | Phuket    | 8.05605 | 98.2778 | 10/1/2020  | 3/3/2020 | OK040303 |
| 45 | B1      | 5 | Nai Thon  | Phuket    | 8.05605 | 98.2778 | 10/1/2020  | 3/3/2020 | OK040380 |
| 46 | B9      | 5 | Nai Thon  | Phuket    | 8.05605 | 98.2778 | 10/1/2020  | 3/3/2020 | -        |
| 47 | TNY01   | 5 | Nai Thon  | Phuket    | 8.05605 | 98.2778 | 10/1/2020  | 3/3/2020 | OK040270 |
| 48 | TNY02   | 5 | Nai Thon  | Phuket    | 8.05605 | 98.2778 | 10/1/2020  | 3/3/2020 | OK040253 |
| 49 | TNY03   | 5 | Nai Thon  | Phuket    | 8.05605 | 98.2778 | 10/1/2020  | 3/3/2020 | OK040261 |
| 50 | TNY04   | 5 | Nai Thon  | Phuket    | 8.05605 | 98.2778 | 10/1/2020  | 3/3/2020 | OK040271 |
| 51 | TNY06   | 5 | Nai Thon  | Phuket    | 8.05605 | 98.2778 | 10/1/2020  | 3/3/2020 | OK040245 |
| 52 | TNY06.1 | 5 | Nai Thon  | Phuket    | 8.05605 | 98.2778 | 10/1/2020  | 3/3/2020 | OK040260 |
| 53 | TNY07   | 5 | Nai Thon  | Phuket    | 8.05605 | 98.2778 | 10/1/2020  | 3/3/2020 | OK040383 |
| 54 | TNY08   | 5 | Nai Thon  | Phuket    | 8.05605 | 98.2778 | 10/1/2020  | 3/3/2020 | OK040384 |
| 55 | TNY09   | 5 | Nai Thon  | Phuket    | 8.05605 | 98.2778 | 10/1/2020  | 3/3/2020 | OK040272 |
| 56 | TNY10   | 5 | Nai Thon  | Phuket    | 8.05605 | 98.2778 | 10/1/2020  | 3/3/2020 | OK040387 |
| 57 | TNY11   | 5 | Nai Thon  | Phuket    | 8.05605 | 98.2778 | 10/1/2020  | 3/3/2020 | OK040273 |
| 58 | TNY12   | 5 | Nai Thon  | Phuket    | 8.05605 | 98.2778 | 10/1/2020  | 3/3/2020 | OK040274 |
| 59 | TNY13   | 5 | Nai Thon  | Phuket    | 8.05605 | 98.2778 | 10/1/2020  | 3/3/2020 | -        |
| 60 | TNY14   | 5 | Nai Thon  | Phuket    | 8.05605 | 98.2778 | 10/1/2020  | 3/3/2020 | OK040275 |
| 61 | TNY15   | 5 | Nai Thon  | Phuket    | 8.05605 | 98.2778 | 10/1/2020  | 3/3/2020 | OK040276 |
| 62 | TNY16   | 5 | Nai Thon  | Phuket    | 8.05605 | 98.2778 | 10/1/2020  | 3/3/2020 | OK040377 |
| 63 | TNY17   | 5 | Nai Thon  | Phuket    | 8.05605 | 98.2778 | 10/1/2020  | 3/3/2020 | OK040277 |
| 64 | KK6.1   | 6 | Khuk Khak | Phang-nga | 8.68706 | 98.2403 | 27/11/2020 | -        | OK040366 |
| 65 | KK6.2   | 6 | Khuk Khak | Phang-nga | 8.68706 | 98.2403 | 27/11/2020 | -        | OK040367 |
| 66 | KK6.3   | 6 | Khuk Khak | Phang-nga | 8.68706 | 98.2403 | 27/11/2020 | -        | OK040368 |
| 67 | KK6.4   | 6 | Khuk Khak | Phang-nga | 8.68706 | 98.2403 | 27/11/2020 | -        | OK040369 |
| 68 | KK6.5   | 6 | Khuk Khak | Phang-nga | 8.68706 | 98.2403 | 27/11/2020 | -        | OK040370 |
| 69 | KK6.6   | 6 | Khuk Khak | Phang-nga | 8.68706 | 98.2403 | 27/11/2020 | -        | OK040371 |
| 70 | KK6.7   | 6 | Khuk Khak | Phang-nga | 8.68706 | 98.2403 | 27/11/2020 | -        | OK040372 |
| 71 | KK6.8   | 6 | Khuk Khak | Phang-nga | 8.68706 | 98.2403 | 27/11/2020 | -        | OK040373 |
| 72 | KK6.9   | 6 | Khuk Khak | Phang-nga | 8.68706 | 98.2403 | 27/11/2020 | -        | OK040374 |
| 73 | BK1.1   | 7 | Bang Kwan | Phang-nga | 8.20907 | 98.2824 | 21/10/2020 | -        | OK040305 |
| 74 | BK1.2   | 7 | Bang Kwan | Phang-nga | 8.20907 | 98.2824 | 21/10/2020 | -        | OK040306 |

|     |        |    |           |           |         |         |            |   |          |
|-----|--------|----|-----------|-----------|---------|---------|------------|---|----------|
| 75  | BK1.3  | 7  | Bang Kwan | Phang-nga | 8.20907 | 98.2824 | 21/10/2020 | - | OK040307 |
| 76  | BK1.4  | 7  | Bang Kwan | Phang-nga | 8.20907 | 98.2824 | 21/10/2020 | - | OK040308 |
| 77  | BK1.5  | 7  | Bang Kwan | Phang-nga | 8.20907 | 98.2824 | 21/10/2020 | - | OK040309 |
| 78  | BK1.6  | 7  | Bang Kwan | Phang-nga | 8.20907 | 98.2824 | 21/10/2020 | - | OK040310 |
| 79  | BK1.7  | 7  | Bang Kwan | Phang-nga | 8.20907 | 98.2824 | 21/10/2020 | - | OK040311 |
| 80  | BK1.8  | 7  | Bang Kwan | Phang-nga | 8.20907 | 98.2824 | 21/10/2020 | - | OK040312 |
| 81  | BK1.9  | 7  | Bang Kwan | Phang-nga | 8.20907 | 98.2824 | 21/10/2020 | - | OK040313 |
| 82  | BK1.10 | 7  | Bang Kwan | Phang-nga | 8.20907 | 98.2824 | 21/10/2020 | - | OK040314 |
| 83  | BK1.11 | 7  | Bang Kwan | Phang-nga | 8.20907 | 98.2824 | 21/10/2020 | - | OK040315 |
| 84  | BK1.12 | 7  | Bang Kwan | Phang-nga | 8.20907 | 98.2824 | 21/10/2020 | - | OK040316 |
| 85  | BK2.1  | 8  | Bang Kwan | Phang-nga | 8.20937 | 98.2826 | 1/11/2020  | - | OK040317 |
| 86  | BK2.2  | 8  | Bang Kwan | Phang-nga | 8.20937 | 98.2826 | 1/11/2020  | - | OK040266 |
| 87  | BK2.3  | 8  | Bang Kwan | Phang-nga | 8.20937 | 98.2826 | 1/11/2020  | - | -        |
| 88  | BK2.4  | 8  | Bang Kwan | Phang-nga | 8.20937 | 98.2826 | 1/11/2020  | - | OK040318 |
| 89  | BK2.5  | 8  | Bang Kwan | Phang-nga | 8.20937 | 98.2826 | 1/11/2020  | - | OK040319 |
| 90  | BK2.6  | 8  | Bang Kwan | Phang-nga | 8.20937 | 98.2826 | 1/11/2020  | - | OK040320 |
| 91  | BK2.7  | 8  | Bang Kwan | Phang-nga | 8.20937 | 98.2826 | 1/11/2020  | - | OK040321 |
| 92  | BK2.8  | 8  | Bang Kwan | Phang-nga | 8.20937 | 98.2826 | 1/11/2020  | - | OK040322 |
| 93  | BK2.9  | 8  | Bang Kwan | Phang-nga | 8.20937 | 98.2826 | 1/11/2020  | - | OK040323 |
| 94  | BK2.10 | 8  | Bang Kwan | Phang-nga | 8.20937 | 98.2826 | 1/11/2020  | - | OK040324 |
| 95  | BK2.11 | 8  | Bang Kwan | Phang-nga | 8.20937 | 98.2826 | 1/11/2020  | - | OK040325 |
| 96  | BK3.1  | 9  | Bang Kwan | Phang-nga | 8.12295 | 98.2826 | 10/11/2020 | - | OK040326 |
| 97  | BK3.2  | 9  | Bang Kwan | Phang-nga | 8.12295 | 98.2826 | 10/11/2020 | - | OK040327 |
| 98  | BK3.3  | 9  | Bang Kwan | Phang-nga | 8.12295 | 98.2826 | 10/11/2020 | - | OK040328 |
| 99  | BK4.1  | 10 | Bang Kwan | Phang-nga | 8.21029 | 98.2825 | 20/11/2020 | - | OK040329 |
| 100 | BK4.2  | 10 | Bang Kwan | Phang-nga | 8.21029 | 98.2825 | 20/11/2020 | - | OK040330 |
| 101 | BK4.4  | 10 | Bang Kwan | Phang-nga | 8.21029 | 98.2825 | 20/11/2020 | - | OK040331 |
| 102 | BK7.1  | 11 | Bang Kwan | Phang-nga | 8.20932 | 98.2824 | 30/11/2020 | - | OK040332 |
| 103 | BK7.2  | 11 | Bang Kwan | Phang-nga | 8.20932 | 98.2824 | 30/11/2020 | - | OK040333 |
| 104 | BK7.4  | 11 | Bang Kwan | Phang-nga | 8.20932 | 98.2824 | 30/11/2020 | - | OK040334 |
| 105 | BK9.1  | 12 | Bang Kwan | Phang-nga | 8.21306 | 98.2831 | 9/12/2020  | - | OK040335 |
| 106 | BK9.2  | 12 | Bang Kwan | Phang-nga | 8.21306 | 98.2831 | 9/12/2020  | - | OK040336 |
| 107 | BK9.3  | 12 | Bang Kwan | Phang-nga | 8.21306 | 98.2831 | 9/12/2020  | - | OK040337 |
| 108 | BK9.4  | 12 | Bang Kwan | Phang-nga | 8.21306 | 98.2831 | 9/12/2020  | - | OK040338 |
| 109 | BK9.5  | 12 | Bang Kwan | Phang-nga | 8.21306 | 98.2831 | 9/12/2020  | - | OK040339 |
| 110 | BK9.6  | 12 | Bang Kwan | Phang-nga | 8.21306 | 98.2831 | 9/12/2020  | - | OK040340 |
| 111 | BK9.7  | 12 | Bang Kwan | Phang-nga | 8.21306 | 98.2831 | 9/12/2020  | - | OK040341 |
| 112 | BK9.8  | 12 | Bang Kwan | Phang-nga | 8.21306 | 98.2831 | 9/12/2020  | - | OK040342 |
| 113 | BK9.9  | 12 | Bang Kwan | Phang-nga | 8.21306 | 98.2831 | 9/12/2020  | - | OK040343 |

|     |         |    |           |           |         |         |            |   |          |
|-----|---------|----|-----------|-----------|---------|---------|------------|---|----------|
| 114 | BK9.10  | 12 | Bang Kwan | Phang-nga | 8.21306 | 98.2831 | 9/12/2020  | - | OK040344 |
| 115 | BK9.11  | 12 | Bang Kwan | Phang-nga | 8.21306 | 98.2831 | 9/12/2020  | - | OK040345 |
| 116 | BK9.12  | 12 | Bang Kwan | Phang-nga | 8.21306 | 98.2831 | 9/12/2020  | - | OK040254 |
| 117 | BK9.13  | 12 | Bang Kwan | Phang-nga | 8.21306 | 98.2831 | 9/12/2020  | - | OK040346 |
| 118 | BK9.14  | 12 | Bang Kwan | Phang-nga | 8.21306 | 98.2831 | 9/12/2020  | - | OK040347 |
| 119 | BK9.15  | 12 | Bang Kwan | Phang-nga | 8.21306 | 98.2831 | 9/12/2020  | - | OK040348 |
| 120 | BK9.16  | 12 | Bang Kwan | Phang-nga | 8.21306 | 98.2831 | 9/12/2020  | - | OK040349 |
| 121 | BK9.17  | 12 | Bang Kwan | Phang-nga | 8.21306 | 98.2831 | 9/12/2020  | - | OK040350 |
| 122 | BK9.18  | 12 | Bang Kwan | Phang-nga | 8.21306 | 98.2831 | 9/12/2020  | - | OK040351 |
| 123 | BK9.19  | 12 | Bang Kwan | Phang-nga | 8.21306 | 98.2831 | 9/12/2020  | - | OK040352 |
| 124 | BK12.1  | 13 | Bang Kwan | Phang-nga | 8.21554 | 98.2832 | 28/12/2020 | - | OK040353 |
| 125 | BK12.2  | 13 | Bang Kwan | Phang-nga | 8.21554 | 98.2832 | 28/12/2020 | - | OK040354 |
| 126 | BK12.3  | 13 | Bang Kwan | Phang-nga | 8.21554 | 98.2832 | 28/12/2020 | - | OK040355 |
| 127 | BK12.4  | 13 | Bang Kwan | Phang-nga | 8.21554 | 98.2832 | 28/12/2020 | - | OK040388 |
| 128 | BK12.5  | 13 | Bang Kwan | Phang-nga | 8.21554 | 98.2832 | 28/12/2020 | - | OK040356 |
| 129 | BK12.6  | 13 | Bang Kwan | Phang-nga | 8.21554 | 98.2832 | 28/12/2020 | - | OK040357 |
| 130 | BK12.7  | 13 | Bang Kwan | Phang-nga | 8.21554 | 98.2832 | 28/12/2020 | - | OK040358 |
| 131 | BK12.8  | 13 | Bang Kwan | Phang-nga | 8.21554 | 98.2832 | 28/12/2020 | - | OK040359 |
| 132 | BK12.9  | 13 | Bang Kwan | Phang-nga | 8.21554 | 98.2832 | 28/12/2020 | - | OK040360 |
| 133 | BK12.10 | 13 | Bang Kwan | Phang-nga | 8.21554 | 98.2832 | 28/12/2020 | - | OK040247 |
| 134 | BK12.11 | 13 | Bang Kwan | Phang-nga | 8.21554 | 98.2832 | 28/12/2020 | - | OK040249 |
| 135 | BK12.12 | 13 | Bang Kwan | Phang-nga | 8.21554 | 98.2832 | 28/12/2020 | - | OK040248 |
| 136 | BK12.13 | 13 | Bang Kwan | Phang-nga | 8.21554 | 98.2832 | 28/12/2020 | - | OK040251 |
| 137 | BK12.14 | 13 | Bang Kwan | Phang-nga | 8.21554 | 98.2832 | 28/12/2020 | - | OK040255 |
| 138 | BK12.15 | 13 | Bang Kwan | Phang-nga | 8.21554 | 98.2832 | 28/12/2020 | - | OK040246 |
| 139 | BK12.16 | 13 | Bang Kwan | Phang-nga | 8.21554 | 98.2832 | 28/12/2020 | - | OK040250 |
| 140 | BK12.17 | 13 | Bang Kwan | Phang-nga | 8.21554 | 98.2832 | 28/12/2020 | - | OK040257 |
| 141 | UK11.1  | 14 | Bang Kwan | Phang-nga | 8.20881 | 98.2822 | 17/12/2020 | - | OK040283 |
| 142 | UK11.2  | 14 | Bang Kwan | Phang-nga | 8.20881 | 98.2822 | 17/12/2020 | - | OK040284 |
| 143 | UK11.3  | 14 | Bang Kwan | Phang-nga | 8.20881 | 98.2822 | 17/12/2020 | - | OK040385 |
| 144 | UK11.4  | 14 | Bang Kwan | Phang-nga | 8.20881 | 98.2822 | 17/12/2020 | - | OK040285 |
| 145 | UK11.5  | 14 | Bang Kwan | Phang-nga | 8.20881 | 98.2822 | 17/12/2020 | - | OK040286 |
| 146 | UK11.6  | 14 | Bang Kwan | Phang-nga | 8.20881 | 98.2822 | 17/12/2020 | - | OK040287 |
| 147 | UK11.7  | 14 | Bang Kwan | Phang-nga | 8.20881 | 98.2822 | 17/12/2020 | - | OK040288 |
| 148 | UK11.8  | 14 | Bang Kwan | Phang-nga | 8.20881 | 98.2822 | 17/12/2020 | - | OK040289 |
| 149 | UK11.9  | 14 | Bang Kwan | Phang-nga | 8.20881 | 98.2822 | 17/12/2020 | - | OK040290 |

---
